# Supplementary material for: Long Noncoding RNA Signature and Disease Outcome in Estrogen Receptor-Positive Breast Cancer Patients Treated with Tamoxifen
Source: PubMed Central journal article supplement — J Breast Cancer. 2018 Sep 12;21(3):277–87. doi: 10.4048/jbc.2018.21.e39 (PMC6158153; doi:10.4048/jbc.2018.21.e39), 2018-09-12
Supplement: jbc-21-277-s001.pdf [file jbc-21-277-s001.pdf]

**Supplementary Table 1.** Detail of the Gene Set Enrichment Analysis for all six lncRNAs

| Gene set                                                                                                          | Gene | ES   | NES  | NOM <i>p</i> -val | FDR <i>q</i> -val | FWER <i>p</i> -val |
|-------------------------------------------------------------------------------------------------------------------|------|------|------|-------------------|-------------------|--------------------|
| REACTOME_RNA_POL_II_TRANSCRIPTION_PRE_INITIATION_AND_PROMOTER_OPENING                                             | 38   | 0.68 | 2.24 | 0.00E+00          | 9.59E-04          | 8.00E-03           |
| REACTOME_MRNA_SPLICING_MINOR_PATHWAY                                                                              | 35   | 0.76 | 2.23 | 0.00E+00          | 9.60E-04          | 9.00E-03           |
| REACTOME_MITOTIC_M_M_G1_PHASES                                                                                    | 137  | 0.66 | 2.26 | 0.00E+00          | 1.04E-03          | 6.00E-03           |
| REACTOME_G1_S_TRANSITION                                                                                          | 93   | 0.70 | 2.24 | 0.00E+00          | 1.05E-03          | 8.00E-03           |
| REACTOME_TRANSCRIPTION                                                                                            | 165  | 0.58 | 2.22 | 0.00E+00          | 1.13E-03          | 1.00E-02           |
| REACTOME_RNA_POL_II_PRE_TRANSCRIPTION_EVENTS                                                                      | 57   | 0.66 | 2.24 | 0.00E+00          | 1.15E-03          | 8.00E-03           |
| REACTOME_HIV_LIFE_CYCLE                                                                                           | 108  | 0.60 | 2.21 | 0.00E+00          | 1.18E-03          | 1.20E-02           |
| REACTOME_DNA_REPLICATION                                                                                          | 156  | 0.66 | 2.26 | 0.00E+00          | 1.19E-03          | 6.00E-03           |
| REACTOME_LATE_PHASE_OF_HIV_LIFE_CYCLE                                                                             | 96   | 0.60 | 2.21 | 0.00E+00          | 1.26E-03          | 1.20E-02           |
| REACTOME_CELL_CYCLE_CHECKPOINTS                                                                                   | 94   | 0.70 | 2.24 | 0.00E+00          | 1.28E-03          | 8.00E-03           |
| REACTOME_CLASS_I_MHC_MEDIATED_ANTIGEN_PROCESSING_PRESENTATION                                                     | 186  | 0.57 | 2.28 | 0.00E+00          | 1.30E-03          | 4.00E-03           |
| REACTOME_CELL_CYCLE_MITOTIC                                                                                       | 253  | 0.61 | 2.26 | 0.00E+00          | 1.39E-03          | 6.00E-03           |
| REACTOME_ANTIGEN_PROCESSING_UBIQUITINATION_PROTEASOME_DEGRADATION                                                 | 153  | 0.59 | 2.29 | 0.00E+00          | 1.40E-03          | 3.00E-03           |
| REACTOME_HIV_INFECTION                                                                                            | 182  | 0.61 | 2.27 | 0.00E+00          | 1.67E-03          | 6.00E-03           |
| REACTOME_CELL_CYCLE                                                                                               | 322  | 0.60 | 2.31 | 0.00E+00          | 1.98E-03          | 2.00E-03           |
| REACTOME_RNA_POL_II_TRANSCRIPTION                                                                                 | 84   | 0.64 | 2.30 | 0.00E+00          | 2.10E-03          | 3.00E-03           |
| REACTOME_M_G1_TRANSITION                                                                                          | 67   | 0.71 | 2.17 | 0.00E+00          | 2.54E-03          | 2.30E-02           |
| REACTOME_HOST_INTERACTIONS_OF_HIV_FACTORS                                                                         | 114  | 0.62 | 2.16 | 0.00E+00          | 2.57E-03          | 2.50E-02           |
| REACTOME_MITOTIC_G1_G1_S_PHASES                                                                                   | 112  | 0.64 | 2.15 | 0.00E+00          | 2.81E-03          | 3.20E-02           |
| REACTOME_DNA_REPAIR                                                                                               | 92   | 0.58 | 2.16 | 0.00E+00          | 2.96E-03          | 3.20E-02           |
| REACTOME_S_PHASE                                                                                                  | 93   | 0.69 | 2.15 | 0.00E+00          | 3.15E-03          | 4.00E-02           |
| REACTOME_MITOTIC_PROMETAPHASE                                                                                     | 66   | 0.62 | 2.12 | 0.00E+00          | 3.68E-03          | 5.20E-02           |
| REACTOME_MRNA_SPLICING                                                                                            | 71   | 0.62 | 2.12 | 0.00E+00          | 3.72E-03          | 5.40E-02           |
| KEGG_BASAL_TRANSCRIPTION_FACTORS                                                                                  | 31   | 0.61 | 2.14 | 0.00E+00          | 3.74E-03          | 4.80E-02           |
| REACTOME_SYNTHESIS_OF_DNA                                                                                         | 78   | 0.70 | 2.12 | 0.00E+00          | 3.83E-03          | 5.20E-02           |
| REACTOME_CHROMOSOME_MAINTENANCE                                                                                   | 93   | 0.62 | 2.12 | 0.00E+00          | 3.86E-03          | 5.40E-02           |
| REACTOME_SCFSKP2_MEDIATED_DEGRADATION_OF_P27_P21                                                                  | 51   | 0.74 | 2.11 | 0.00E+00          | 3.88E-03          | 5.90E-02           |
| REACTOME_REGULATION_OF_MITOTIC_CELL_CYCLE                                                                         | 69   | 0.71 | 2.13 | 0.00E+00          | 3.90E-03          | 5.10E-02           |
| KEGG_CELL_CYCLE                                                                                                   | 105  | 0.56 | 2.11 | 0.00E+00          | 3.91E-03          | 5.70E-02           |
| REACTOME_REGULATION_OF_MRNA_STABILITY_BY_PROTEINS_THAT_BIND_AU_RICH_ELEMENTS                                      | 73   | 0.66 | 2.13 | 0.00E+00          | 3.97E-03          | 5.10E-02           |
| REACTOME_APC_C_CDC20_MEDIATED_DEGRADATION_OF_MITOTIC_PROTEINS                                                     | 58   | 0.72 | 2.07 | 0.00E+00          | 4.32E-03          | 8.80E-02           |
| REACTOME_FORMATION_OF_RNA_POL_II_ELONGATION_COMPLEX                                                               | 41   | 0.65 | 2.08 | 0.00E+00          | 4.53E-03          | 8.80E-02           |
| REACTOME_NUCLEOTIDE_EXCISION_REPAIR                                                                               | 47   | 0.60 | 2.08 | 0.00E+00          | 4.64E-03          | 8.80E-02           |
| REACTOME_MRNA_PROCESSING                                                                                          | 114  | 0.57 | 2.10 | 0.00E+00          | 4.64E-03          | 6.90E-02           |
| KEGG_HUNTINGTONS_DISEASE                                                                                          | 151  | 0.56 | 2.07 | 0.00E+00          | 4.73E-03          | 9.40E-02           |
| REACTOME_CYCLIN_E_ASSOCIATED_EVENTS_DURING_G1_S_TRANSITION                                                        | 60   | 0.71 | 2.10 | 0.00E+00          | 4.75E-03          | 6.80E-02           |
| REACTOME_ORC1_REMOVAL_FROM_CHROMATIN                                                                              | 56   | 0.71 | 2.08 | 0.00E+00          | 4.75E-03          | 8.80E-02           |
| REACTOME_APC_C_CDH1_MEDIATED_DEGRADATION_OF_CDC20_AND_OTHER_APC_C_CDH1_TARGETED_PROTEINS_IN_LATE_MITOSIS_EARLY_G1 | 58   | 0.72 | 2.08 | 0.00E+00          | 4.85E-03          | 8.70E-02           |
| KEGG_SPLICEOSOME                                                                                                  | 84   | 0.63 | 2.08 | 0.00E+00          | 4.95E-03          | 8.60E-02           |
| REACTOME_AUTODEGRADATION_OF_CDH1_BY_CDH1_APC_C                                                                    | 51   | 0.73 | 2.06 | 0.00E+00          | 4.95E-03          | 9.80E-02           |
| REACTOME_PROCESSING_OF_CAPPED_INTRON_CONTAINING_PRE_MRNA                                                          | 99   | 0.58 | 2.08 | 0.00E+00          | 5.05E-03          | 8.60E-02           |
| REACTOME_P53_DEPENDENT_G1_DNA_DAMAGE_RESPONSE                                                                     | 50   | 0.71 | 2.08 | 0.00E+00          | 5.08E-03          | 8.40E-02           |
| REACTOME_METABOLISM_OF_NON_CODING_RNA                                                                             | 39   | 0.65 | 2.05 | 0.00E+00          | 5.14E-03          | 1.06E-01           |
| REACTOME_CLEAVAGE_OF_GROWING_TRANSCRIPT_IN_THE_TERMINATION_REGION                                                 | 27   | 0.68 | 2.08 | 0.00E+00          | 5.18E-03          | 8.40E-02           |
| REACTOME_PROCESSING_OF_CAPPED_INTRONLESS_PRE_MRNA                                                                 | 17   | 0.75 | 2.05 | 0.00E+00          | 5.19E-03          | 1.04E-01           |
| KEGG_PARKINSONS_DISEASE                                                                                           | 96   | 0.64 | 2.05 | 0.00E+00          | 5.30E-03          | 1.09E-01           |
| REACTOME_APOPTOSIS                                                                                                | 128  | 0.52 | 2.08 | 0.00E+00          | 5.33E-03          | 8.40E-02           |
| REACTOME_TRANSCRIPTION_COUPLED_NER_TC_NER                                                                         | 42   | 0.62 | 2.08 | 0.00E+00          | 5.34E-03          | 8.00E-02           |
| REACTOME_VIF_MEDIATED_DEGRADATION_OF_APOBEC3G                                                                     | 47   | 0.75 | 2.04 | 0.00E+00          | 5.39E-03          | 1.12E-01           |
| REACTOME_ASSEMBLY_OF_THE_PRE_REPLICATIVE_COMPLEX                                                                  | 54   | 0.71 | 2.04 | 0.00E+00          | 5.76E-03          | 1.27E-01           |
| REACTOME_SIGNALING_BY_WNT                                                                                         | 59   | 0.67 | 2.03 | 0.00E+00          | 5.95E-03          | 1.30E-01           |

*(Continued to the next page)*

Supplementary Table 1. Continued

| Gene set                                                                                                                  | Gene | ES   | NES  | NOM <i>p</i> -val | FDR <i>q</i> -val | FWER <i>p</i> -val |
|---------------------------------------------------------------------------------------------------------------------------|------|------|------|-------------------|-------------------|--------------------|
| REACTOME_ACTIVATION_OF_NF_KAPPAB_IN_B_CELLS                                                                               | 56   | 0.69 | 2.03 | 0.00E+00          | 5.96E-03          | 1.33E-01           |
| REACTOME_CDK_MEDIATED_PHOSPHORYLATION_AND_REMOVAL_OF_CDC6                                                                 | 44   | 0.74 | 2.03 | 0.00E+00          | 6.02E-03          | 1.37E-01           |
| REACTOME_TCA_CYCLE_AND_RESPIRATORY_ELECTRON_TRANSPORT                                                                     | 103  | 0.66 | 2.03 | 0.00E+00          | 6.02E-03          | 1.37E-01           |
| REACTOME_SCF_BETA_TROP_MEDIATED_DEGRADATION_OF_EMI1                                                                       | 46   | 0.74 | 2.02 | 0.00E+00          | 6.63E-03          | 1.52E-01           |
| PID_BARD1_PATHWAY                                                                                                         | 28   | 0.62 | 2.02 | 0.00E+00          | 6.78E-03          | 1.61E-01           |
| KEGG_UBIQUITIN_MEDIATED_PROTEOLYSIS                                                                                       | 108  | 0.48 | 2.01 | 0.00E+00          | 6.88E-03          | 1.69E-01           |
| REACTOME_TRNA_AMINOACYLATION                                                                                              | 29   | 0.69 | 1.97 | 0.00E+00          | 8.05E-03          | 2.35E-01           |
| REACTOME_REGULATION_OF_APOPTOSIS                                                                                          | 51   | 0.67 | 1.98 | 0.00E+00          | 8.11E-03          | 2.24E-01           |
| REACTOME_ACTIVATION_OF_GENES_BY_ATF4                                                                                      | 21   | 0.62 | 1.97 | 0.00E+00          | 8.12E-03          | 2.35E-01           |
| REACTOME_MRNA_CAPPING                                                                                                     | 27   | 0.65 | 1.98 | 0.00E+00          | 8.13E-03          | 2.24E-01           |
| REACTOME_REGULATORY_RNA_PATHWAYS                                                                                          | 21   | 0.64 | 1.97 | 0.00E+00          | 8.16E-03          | 2.33E-01           |
| REACTOME_PURINE_METABOLISM                                                                                                | 27   | 0.64 | 1.98 | 0.00E+00          | 8.17E-03          | 2.27E-01           |
| REACTOME_CDT1_ASSOCIATION_WITH_THE_CDC6_ORC_ORIGIN_COMPLEX                                                                | 45   | 0.73 | 1.98 | 0.00E+00          | 8.21E-03          | 2.18E-01           |
| REACTOME_AUTODEGRADATION_OF_THE_E3_UBIQUITIN_LIGASE_COP1                                                                  | 44   | 0.73 | 1.98 | 0.00E+00          | 8.24E-03          | 2.21E-01           |
| REACTOME_P53_INDEPENDENT_G1_S_DNA_DAMAGE_CHECKPOINT                                                                       | 46   | 0.72 | 1.97 | 0.00E+00          | 8.24E-03          | 2.32E-01           |
| REACTOME_RNA_POL_I_RNA_POL_III_AND_MITOCHONDRIAL_TRANSCRIPTION                                                            | 95   | 0.57 | 1.99 | 0.00E+00          | 8.26E-03          | 2.04E-01           |
| REACTOME_FORMATION_OF_TRANSCRIPTION_COUPLED_NER_TC_NER_REPAIR_COMPLEX                                                     | 27   | 0.61 | 1.98 | 0.00E+00          | 8.32E-03          | 2.18E-01           |
| REACTOME_FORMATION_OF_THE_HIV1_EARLY_ELONGATION_COMPLEX                                                                   | 31   | 0.65 | 1.96 | 0.00E+00          | 8.39E-03          | 2.45E-01           |
| REACTOME_ELONGATION_ARREST_AND_RECOVERY                                                                                   | 31   | 0.64 | 1.98 | 0.00E+00          | 8.55E-03          | 2.18E-01           |
| REACTOME_METABOLISM_OF_NUCLEOTIDES                                                                                        | 56   | 0.57 | 1.98 | 0.00E+00          | 8.61E-03          | 2.16E-01           |
| REACTOME_REGULATION_OF_ORNITHINE_DECARBOXYLASE_ODC                                                                        | 46   | 0.73 | 1.98 | 0.00E+00          | 8.71E-03          | 2.15E-01           |
| KEGG_OXIDATIVE_PHOSPHORYLATION                                                                                            | 98   | 0.63 | 1.98 | 0.00E+00          | 8.79E-03          | 2.14E-01           |
| REACTOME_ACTIVATION_OF_ATR_IN_RESPONSE_TO_REPLICATION_STRESS                                                              | 26   | 0.73 | 1.96 | 0.00E+00          | 9.10E-03          | 2.63E-01           |
| REACTOME_DOWNSTREAM_SIGNALING_EVENTS_OF_B_CELL_RECEPTOR_BCR                                                               | 78   | 0.58 | 1.95 | 0.00E+00          | 9.15E-03          | 2.76E-01           |
| REACTOME_G2_M_CHECKPOINTS                                                                                                 | 31   | 0.71 | 1.95 | 0.00E+00          | 9.29E-03          | 2.75E-01           |
| REACTOME_ANTIVIRAL_MECHANISM_BY_IFN_STIMULATED_GENES                                                                      | 60   | 0.56 | 2.05 | 1.96E-03          | 5.08E-03          | 1.04E-01           |
| REACTOME_ER_PHAGOSOME_PATHWAY                                                                                             | 56   | 0.69 | 1.99 | 1.96E-03          | 8.10E-03          | 2.01E-01           |
| REACTOME_RESPIRATORY_ELECTRON_TRANSPORT_ATP_SYNTHESIS_BY_CHEMIOSMOTIC_COUPLING_AND_HEAT_PRODUCTION_BY_UNCOUPLING_PROTEINS | 72   | 0.69 | 1.95 | 1.96E-03          | 9.44E-03          | 2.74E-01           |
| REACTOME_DESTABILIZATION_OF_MRNA_BY_AUF1_HNRNP_D0                                                                         | 47   | 0.72 | 1.97 | 1.98E-03          | 8.09E-03          | 2.35E-01           |
| KEGG_PROTEASOME                                                                                                           | 41   | 0.78 | 2.01 | 1.98E-03          | 6.86E-03          | 1.64E-01           |
| REACTOME_ANTIGEN_PROCESSING_CROSS_PRESENTATION                                                                            | 68   | 0.63 | 2.00 | 1.99E-03          | 7.80E-03          | 1.92E-01           |
| REACTOME_MITOCHONDRIAL_PROTEIN_IMPORT                                                                                     | 40   | 0.63 | 1.97 | 2.05E-03          | 7.99E-03          | 2.35E-01           |
| REACTOME_TELOMERE_MAINTENANCE                                                                                             | 60   | 0.65 | 1.98 | 2.08E-03          | 8.44E-03          | 2.18E-01           |
| KEGG_DNA_REPLICATION                                                                                                      | 32   | 0.73 | 2.08 | 2.09E-03          | 4.42E-03          | 8.80E-02           |
| KEGG_PYRIMIDINE_METABOLISM                                                                                                | 73   | 0.54 | 1.95 | 2.09E-03          | 9.24E-03          | 2.76E-01           |
| REACTOME_CYTOSOLIC_TRNA_AMINOACYLATION                                                                                    | 20   | 0.74 | 2.00 | 2.10E-03          | 7.91E-03          | 1.92E-01           |
| REACTOME_DEPOSITION_OF_NEW_CENPA_CONTAINING_NUCLEOSOMES_AT_THE_CENTROMERE                                                 | 45   | 0.65 | 1.95 | 2.13E-03          | 9.35E-03          | 2.74E-01           |
| REACTOME_MICRORNA_MIRNA_BIOGENESIS                                                                                        | 20   | 0.65 | 1.96 | 2.20E-03          | 8.46E-03          | 2.49E-01           |
| PID_FANCONI_PATHWAY                                                                                                       | 37   | 0.63 | 2.06 | 2.21E-03          | 4.84E-03          | 9.80E-02           |
| REACTOME_INTERACTIONS_OF_VPR_WITH_HOST_CELLULAR_PROTEINS                                                                  | 31   | 0.60 | 1.98 | 2.25E-03          | 8.15E-03          | 2.22E-01           |

lncRNA = long noncoding RNA; ES = enrichment score; NES = normalized enrichment score; NOM *p*-val = nominal *p*-value; FDR *q*-val = false discovery rate *q*-value; FWER *p*-val = familywise-error rate *p*-value.
