# Supplementary material for: Long Noncoding RNA Signature and Disease Outcome in Estrogen Receptor-Positive Breast Cancer Patients Treated with Tamoxifen
Source: PubMed Central journal article supplement — J Breast Cancer. 2018 Sep 12;21(3):277–87. doi: 10.4048/jbc.2018.21.e39 (PMC6158153; doi:10.4048/jbc.2018.21.e39), 2018-09-12
Supplement: jbc-21-277-s003.pdf [file jbc-21-277-s003.pdf]

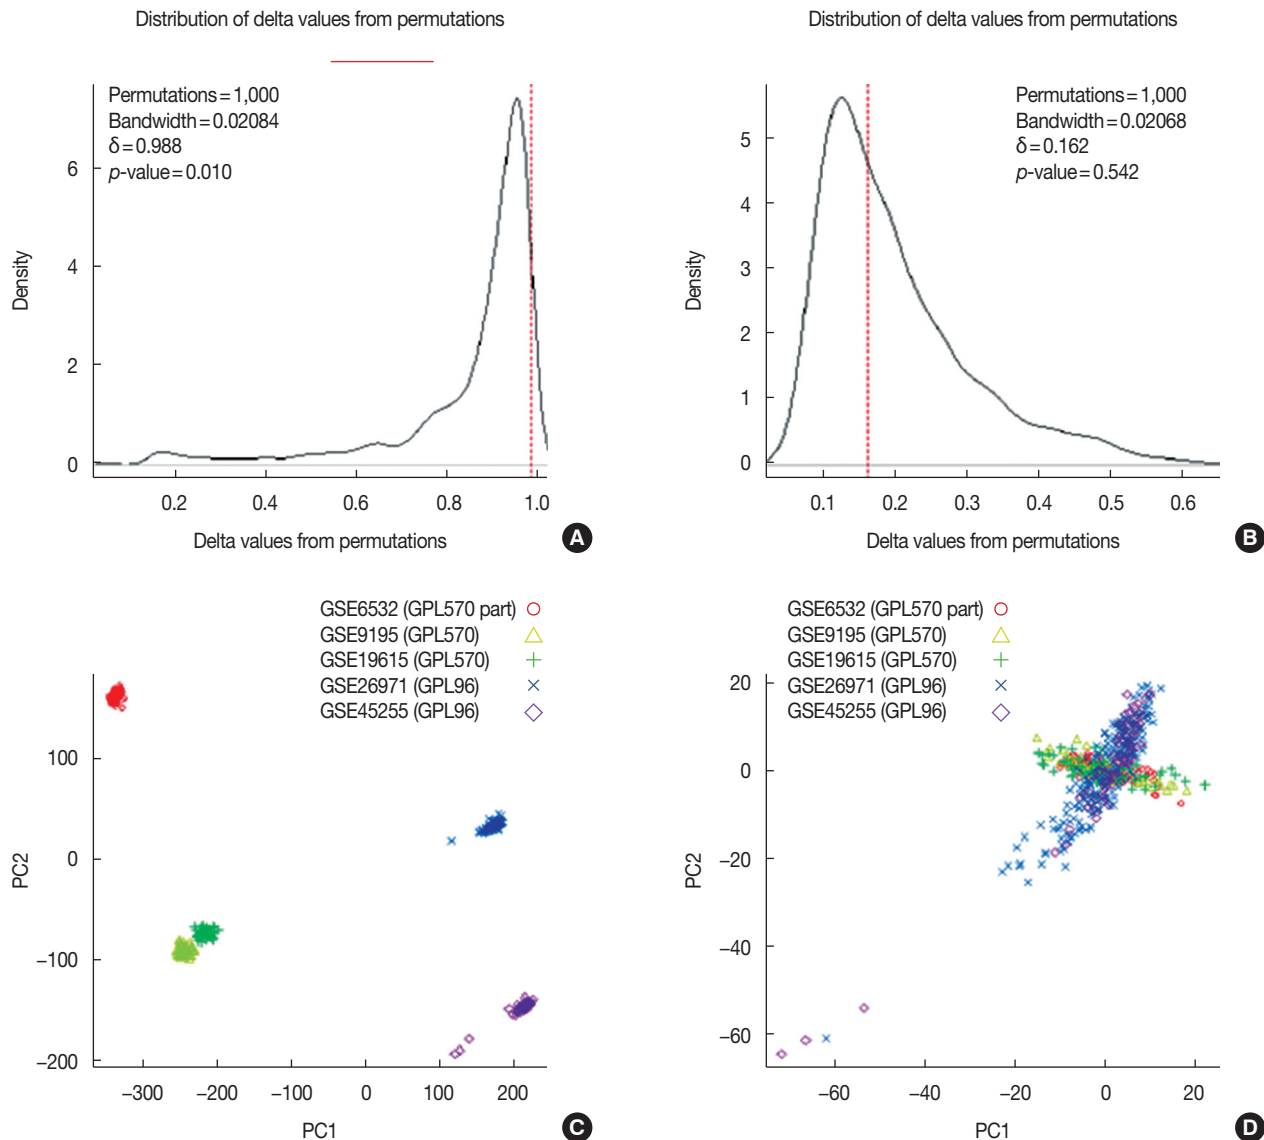

**Supplementary Figure 2.** The evaluation of batch effect before and after normalization in the validation dataset. The batch effect before and after Combat function normalization was assessed by Guided Principal Components Analysis package for validation dataset. The variance among batches was statistically assessed with  $p$ -value before (A) and after (B) Combat normalization for validation dataset. Meanwhile, the first two principle components (PC) of each batch were also compared before (C) and after (D) Combat normalization.
